# Supplementary material for: Synthesis and Characterization of Fluorinated Phosphonium Ionic Liquids to Use as New Engineering Solvents
Source: MDPI journal article supplement (doi:10.3390/chemengineering6030038), 2022-05-24
Supplement: s1 [file s1]

## Supplementary Materials

# Synthesis and Characterization of Fluorinated Phosphonium Ionic Liquids to use as New Engineering Solvents

María C. Naranjo <sup>1,2</sup>, Andres E. Redondo <sup>1</sup>, Jacqueline C. Acuña <sup>2</sup>, Nicole S. M. Vieira <sup>1</sup>, João M. M. Araújo <sup>1</sup> and Ana B. Pereiro <sup>1,\*</sup>

<sup>1</sup> LAQV, REQUIMTE, Department of Chemistry, NOVA School of Science and Technology, NOVA University Lisbon, Caparica, 2829-516, Portugal; mcn.garcia@campus.fct.unl.pt (M.C.N.); a.soto@campus.fct.unl.pt (A.E.R.); ns.vieira@campus.fct.unl.pt (N.S.M.V.); jmmda@fct.unl.pt (J.M.M.A.); anab@fct.unl.pt (A.B.P.).

<sup>2</sup> Faculty of Architecture and Engineering, Chemical Engineering Research Group, SINVINQ, University of Pamplona, Pamplona, 543050, Colombia; jacqueline.corredor@unipamplona.edu.co (J.C.A.).

\* Correspondence: Email: anab@fct.unl.pt. Fax: (+351) 212948550. Tel.: (+351) 212948318.

### 1. Synthesis procedure, NMR and elemental analysis

**[P<sub>66614</sub>][C<sub>4</sub>F<sub>9</sub>SO<sub>3</sub>] synthesis:** 3.84 g of [P<sub>66614</sub>]Cl was dissolved in ethanol and transformed into hydroxide by the use of an anionic exchange resin. Then, the prepared hydroxide was neutralized with C<sub>4</sub>F<sub>9</sub>SO<sub>3</sub>H (2.29 g dissolved in ethanol). The solution was then evaporated in a rotavapor. The colourless liquid was washed with a solution of 90% acetonitrile in ethanol. The oil obtained was dried in a vacuum line and was obtained into a light-yellow liquid.

[P<sub>66614</sub>][C<sub>4</sub>F<sub>9</sub>SO<sub>3</sub>]: <sup>1</sup>H RMN δ<sub>H</sub> (400 MHz, (CD<sub>3</sub>)<sub>2</sub>CO): 0.80-0.93 (m, 12H, 3xPCH<sub>2</sub>(CH<sub>2</sub>)<sub>2</sub>CH<sub>3</sub> and CH<sub>3</sub>(CH<sub>2</sub>)<sub>12</sub>CH<sub>2</sub>P), 1.16-1.53 (m, 48H, 3xPCH<sub>2</sub>(CH<sub>2</sub>)<sub>4</sub>CH<sub>3</sub> and CH<sub>3</sub>(CH<sub>2</sub>)<sub>12</sub>CH<sub>2</sub>P), 2.10-2.24 (m, 8H, 3xPCH<sub>2</sub>(CH<sub>2</sub>)<sub>2</sub>CH<sub>3</sub> and CH<sub>3</sub>(CH<sub>2</sub>)<sub>12</sub>CH<sub>2</sub>P). <sup>19</sup>F NMR δ<sub>F</sub> (376 MHz, (CD<sub>3</sub>)<sub>2</sub>CO): -80.46 (m, 3F, CF<sub>3</sub>), -114.84 (m, 2F, CF<sub>2</sub>SO<sub>3</sub>), -121.39 (m, 2F, CF<sub>3</sub>CF<sub>2</sub>), -125.75 (m, 2F, CF<sub>3</sub>CF<sub>2</sub>CF<sub>2</sub>). Elemental analysis calculated (found): %C 55.23 (53.32); %H 8.75 (8.42); %S 4.10 (4.11).

**[P<sub>66614</sub>][C<sub>4</sub>F<sub>9</sub>CO<sub>2</sub>] synthesis:** 3.70 g of [P<sub>66614</sub>]Cl was dissolved in ethanol and transformed into hydroxide by the use of an anionic exchange resin. Then, the prepared hydroxide was neutralized with C<sub>4</sub>F<sub>9</sub>CO<sub>2</sub>H (1.82 g dissolved in ethanol). The solution was then evaporated in a rotavapor. The colourless liquid was washed with a solution of 90% acetonitrile in ethanol. The oil obtained was dried in a vacuum line and was obtained into a colourless liquid.

[P<sub>66614</sub>][C<sub>4</sub>F<sub>9</sub>CO<sub>2</sub>]: <sup>1</sup>H RMN δ<sub>H</sub> (400 MHz, (CD<sub>3</sub>)<sub>2</sub>CO): 0.81-0.94 (m, 12H, 3xPCH<sub>2</sub>(CH<sub>2</sub>)<sub>2</sub>CH<sub>3</sub> and CH<sub>3</sub>(CH<sub>2</sub>)<sub>12</sub>CH<sub>2</sub>P), 1.17-1.59 (m, 48H, 3xPCH<sub>2</sub>(CH<sub>2</sub>)<sub>4</sub>CH<sub>3</sub> and CH<sub>3</sub>(CH<sub>2</sub>)<sub>12</sub>CH<sub>2</sub>P), 2.11-2.27 (m, 8H, 3xPCH<sub>2</sub>(CH<sub>2</sub>)<sub>2</sub>CH<sub>3</sub> and CH<sub>3</sub>(CH<sub>2</sub>)<sub>12</sub>CH<sub>2</sub>P). <sup>19</sup>F NMR δ<sub>F</sub> (376 MHz, (CD<sub>3</sub>)<sub>2</sub>CO): -80.61 (m, 3F, CF<sub>3</sub>), -115.57 (m, 2F, CF<sub>2</sub>SO<sub>3</sub>), -122.75 (m, 2F, CF<sub>3</sub>CF<sub>2</sub>), -125.51 (m, 2F, CF<sub>3</sub>CF<sub>2</sub>CF<sub>2</sub>). Elemental analysis calculated (found): %C 59.50 (57.09); %H 9.18 (8.66).

**[P<sub>44414</sub>][C<sub>4</sub>F<sub>9</sub>SO<sub>3</sub>] synthesis:** 3.29 g of [P<sub>44414</sub>]Cl was dissolved in one solution of 30% ethanol in water and transformed into hydroxide by the use of an anionic exchange resin. The solution was added with a few portions of ethanol during the process because the solution become cloudy. Then, the prepared hydroxide was neutralized with C<sub>4</sub>F<sub>9</sub>SO<sub>3</sub>H (2.34 g dissolved in one solution of 30% ethanol in water). The solution was then evaporated in rotavapor. The light-yellow liquid was washed with a solution of

90% acetonitrile in ethanol. The oil obtained was dried in a vacuum line and was obtained into an orange liquid.

[P<sub>44414</sub>][C<sub>4</sub>F<sub>9</sub>SO<sub>3</sub>]: <sup>1</sup>H RMN δ<sub>H</sub> (400 MHz, (CD<sub>3</sub>)<sub>2</sub>CO): 0.83-0.98 (m, 12H, 3xPCH<sub>2</sub>(CH<sub>2</sub>)<sub>2</sub>CH<sub>3</sub> and CH<sub>3</sub>(CH<sub>2</sub>)<sub>12</sub>CH<sub>2</sub>P), 1.18-1.54 (m, 36H, 3xPCH<sub>2</sub>(CH<sub>2</sub>)<sub>2</sub>CH<sub>3</sub> and CH<sub>3</sub>(CH<sub>2</sub>)<sub>12</sub>CH<sub>2</sub>P), 2.11-2.26 (m, 8H, 3xPCH<sub>2</sub>(CH<sub>2</sub>)<sub>2</sub>CH<sub>3</sub> and CH<sub>3</sub>(CH<sub>2</sub>)<sub>12</sub>CH<sub>2</sub>P). <sup>19</sup>F NMR δ<sub>F</sub> (376 MHz, (CD<sub>3</sub>)<sub>2</sub>CO): -80.45 (m, 3F, CF<sub>3</sub>), -114.83 (m, 2F, CF<sub>2</sub>SO<sub>3</sub>), -121.37 (m, 2F, CF<sub>3</sub>CF<sub>2</sub>), -125.66 (m, 2F, CF<sub>3</sub>CF<sub>2</sub>CF<sub>2</sub>). Elemental analysis calculated (found): %C 51.56 (48.49); %H 8.08 (7.68); %S 4.59 (4.90).

**[P<sub>44414</sub>][C<sub>4</sub>F<sub>9</sub>CO<sub>2</sub>] synthesis:** 3.50 g of [P<sub>44414</sub>]Cl was dissolved in one solution of 30% ethanol in water and transformed into hydroxide by the use of an anionic exchange resin. The solution was added with a few portions of ethanol during the process because the solution become cloudy. Then, the prepared hydroxide was neutralized with C<sub>4</sub>F<sub>9</sub>CO<sub>2</sub>H (2.21 g dissolved in one solution of 30% ethanol in water). The solution was then evaporated in a rotavapor. The colourless liquid was washed with a solution of 90% acetonitrile in ethanol. The oil obtained was dried in a vacuum line and was obtained into a colourless liquid.

[P<sub>44414</sub>][C<sub>4</sub>F<sub>9</sub>CO<sub>2</sub>]: <sup>1</sup>H RMN δ<sub>H</sub> (400 MHz, (CD<sub>3</sub>)<sub>2</sub>CO): 0.80-0.96 (m, 12H, 3xPCH<sub>2</sub>(CH<sub>2</sub>)<sub>2</sub>CH<sub>3</sub> and CH<sub>3</sub>(CH<sub>2</sub>)<sub>12</sub>CH<sub>2</sub>P), 1.17-1.54 (m, 36H, 3xPCH<sub>2</sub>(CH<sub>2</sub>)<sub>2</sub>CH<sub>3</sub> and CH<sub>3</sub>(CH<sub>2</sub>)<sub>12</sub>CH<sub>2</sub>P), 2.09-2.25 (m, 8H, 3xPCH<sub>2</sub>(CH<sub>2</sub>)<sub>2</sub>CH<sub>3</sub> and CH<sub>3</sub>(CH<sub>2</sub>)<sub>12</sub>CH<sub>2</sub>P). <sup>19</sup>F NMR δ<sub>F</sub> (376 MHz, (CD<sub>3</sub>)<sub>2</sub>CO): -80.52 (m, 3F, CF<sub>3</sub>), -115.35 (m, 2F, CF<sub>2</sub>SO<sub>3</sub>), -122.67 (m, 2F, CF<sub>3</sub>CF<sub>2</sub>), -125.49 (m, 2F, CF<sub>3</sub>CF<sub>2</sub>CF<sub>2</sub>). Elemental analysis calculated (found): %C 56.18 (53.89); %H 8.52 (8.13).

**[P<sub>4444</sub>][C<sub>4</sub>F<sub>9</sub>SO<sub>3</sub>] synthesis:** 3.29 g of [P<sub>4444</sub>]Br was dissolved in water and transformed into hydroxide by the use of an anionic exchange resin. The solution was added with a few portions of ethanol during the process because the solution become cloudy. Then, the prepared hydroxide was neutralized with C<sub>4</sub>F<sub>9</sub>SO<sub>3</sub>H (3.00 g dissolved in water). The solution was then evaporated in a rotavapor. The liquid was washed with a solution of 90% acetonitrile in ethanol. The oil obtained was dried in a vacuum line and was obtained as a solid.

[P<sub>4444</sub>][C<sub>4</sub>F<sub>9</sub>SO<sub>3</sub>]: <sup>1</sup>H NMR δ<sub>H</sub> (400 MHz, (CD<sub>3</sub>)<sub>2</sub>CO): 0.88-1.00 98 (m, 12H, 4xPCH<sub>2</sub>(CH<sub>2</sub>)<sub>2</sub>CH<sub>3</sub>), 1.33-1.56 (m, 16H, 4xPCH<sub>2</sub>(CH<sub>2</sub>)<sub>2</sub>CH<sub>3</sub>), 2.11-2.26 (m, 8H, 4xPCH<sub>2</sub>(CH<sub>2</sub>)<sub>2</sub>CH<sub>3</sub>). <sup>19</sup>F NMR δ<sub>F</sub> (376 MHz, (CD<sub>3</sub>)<sub>2</sub>CO): -80.52 (m, 3F, CF<sub>3</sub>), -114.86 (m, 2F, CF<sub>2</sub>SO<sub>3</sub>), -121.37 (m, 2F, CF<sub>3</sub>CF<sub>2</sub>), -125.70 (m, 2F, CF<sub>3</sub>CF<sub>2</sub>CF<sub>2</sub>). Elemental analysis calculated (found): %C 43.01 (40.09); %H 6.50 (6.12); %S 5.74 (6.07).

**[P<sub>4444</sub>][C<sub>4</sub>F<sub>9</sub>CO<sub>2</sub>] synthesis:** 3.42 g of [P<sub>44414</sub>]Br was dissolved in water and transformed into hydroxide by the use of an anionic exchange resin. The solution was added with a few portions of ethanol during the process because the solution become cloudy. Then, the prepared hydroxide was neutralized with C<sub>4</sub>F<sub>9</sub>CO<sub>2</sub>H (2.77g dissolved in water). The solution was then evaporated in a rotavapor. The colourless liquid was washed with a solution of 90% acetonitrile in ethanol. The oil obtained was dried in a vacuum line and was obtained into a colourless solid.

[P<sub>4444</sub>][C<sub>4</sub>F<sub>9</sub>CO<sub>2</sub>]: <sup>1</sup>H NMR δ<sub>H</sub> (400 MHz, (CD<sub>3</sub>)<sub>2</sub>CO): 0.87-0.98 98 (m, 12H, 4xPCH<sub>2</sub>(CH<sub>2</sub>)<sub>2</sub>CH<sub>3</sub>), 1.33-1.55 (m, 16H, 4xPCH<sub>2</sub>(CH<sub>2</sub>)<sub>2</sub>CH<sub>3</sub>), 2.11-2.25 (m, 8H, 4xPCH<sub>2</sub>(CH<sub>2</sub>)<sub>2</sub>CH<sub>3</sub>). <sup>19</sup>F NMR δ<sub>F</sub> (376 MHz, (CD<sub>3</sub>)<sub>2</sub>CO): -80.57 (m, 3F, CF<sub>3</sub>), -115.48 (m, 2F, CF<sub>2</sub>CO<sub>2</sub>), -122.73 (m, 2F, CF<sub>3</sub>CF<sub>2</sub>), -125.50 (m, 2F, CF<sub>3</sub>CF<sub>2</sub>CF<sub>2</sub>). Elemental analysis calculated (found): %C 48.28 (44.69); %H 6.95 (6.49).

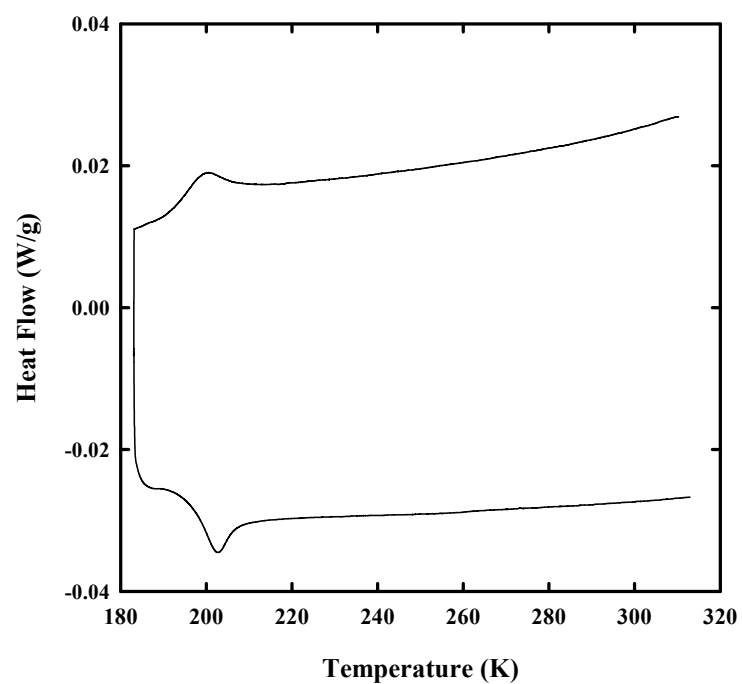

Figure S1. Differential scanning calorimetry curves at 1 K/min of  $[P_{66614}][C_4F_9SO_3]$ .

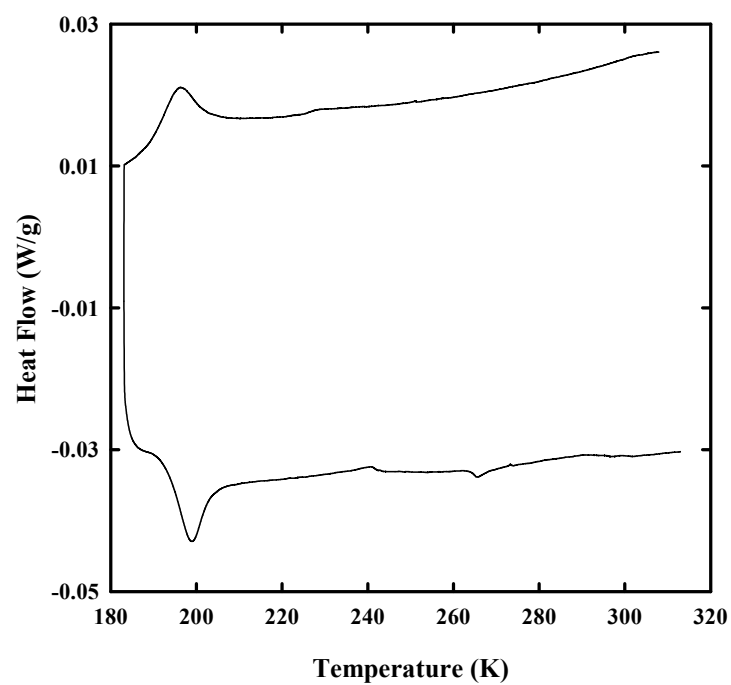

Figure S2. Differential scanning calorimetry curves at 1 K/min of  $[P_{66614}][C_4F_9CO_2]$ .

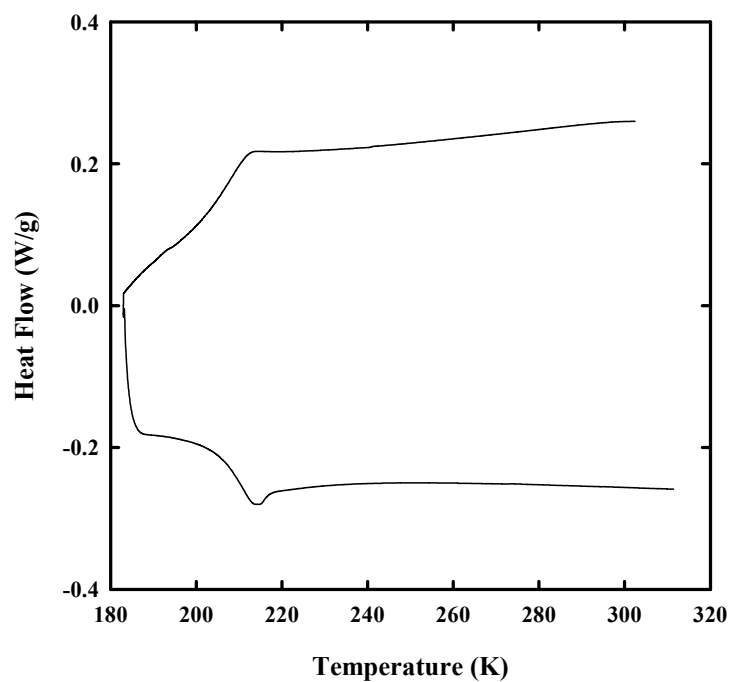

Figure S3. Differential scanning calorimetry curves at 10 K/min of [P<sub>44414</sub>][C<sub>4</sub>F<sub>9</sub>SO<sub>3</sub>].

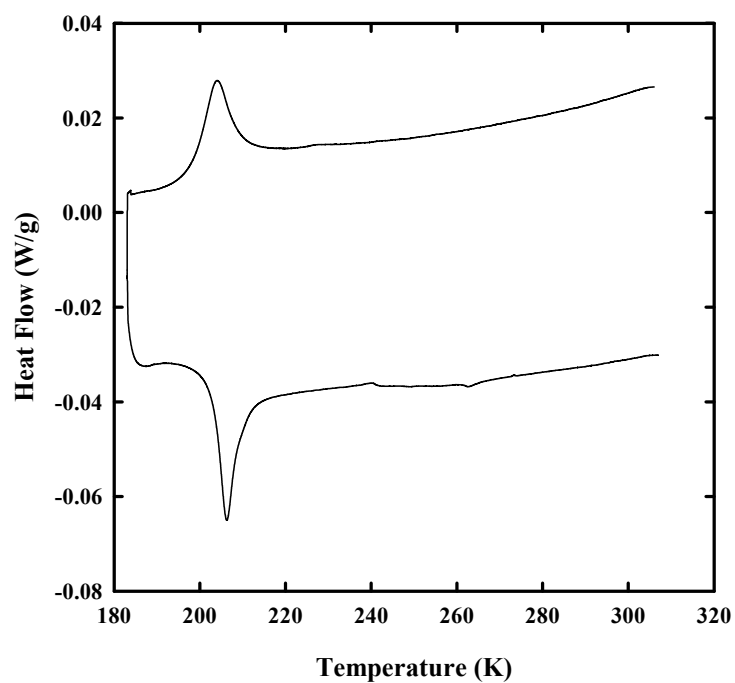

Figure S4. Differential scanning calorimetry curves at 1 K/min of [P<sub>44414</sub>][C<sub>4</sub>F<sub>9</sub>CO<sub>2</sub>].

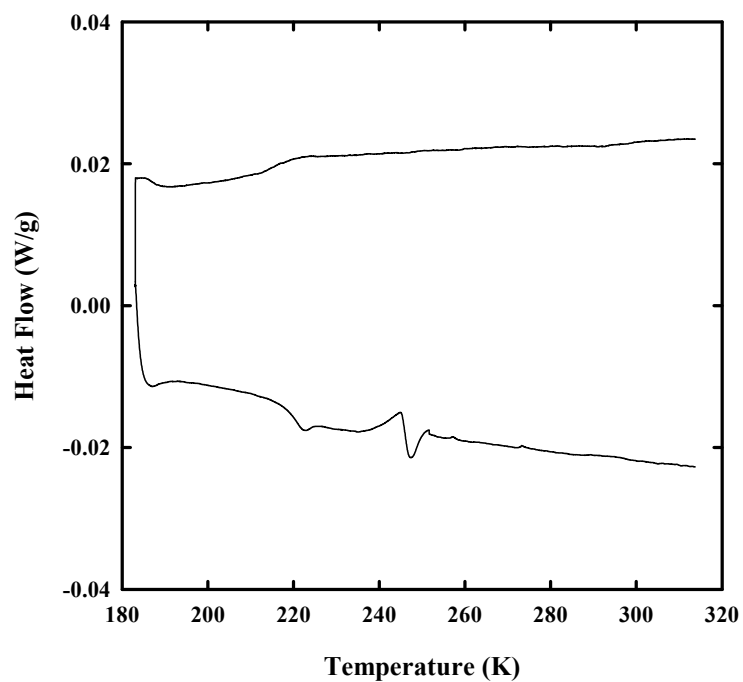

Figure S5. Differential scanning calorimetry curves at 1 K/min of  $[P_{4444}][C_4F_9SO_3]$ .

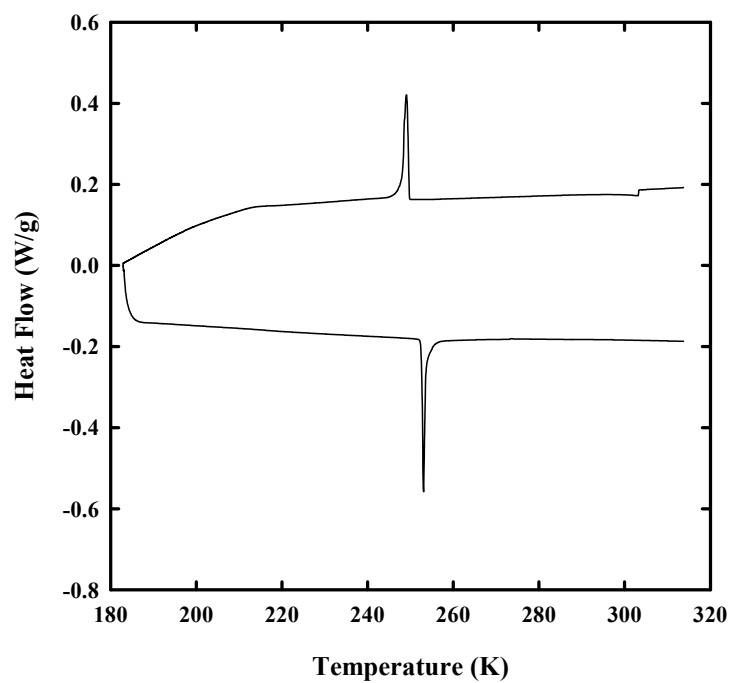

Figure S6. Differential scanning calorimetry curves at 10 K/min of  $[P_{4444}][C_4F_9CO_2]$ .

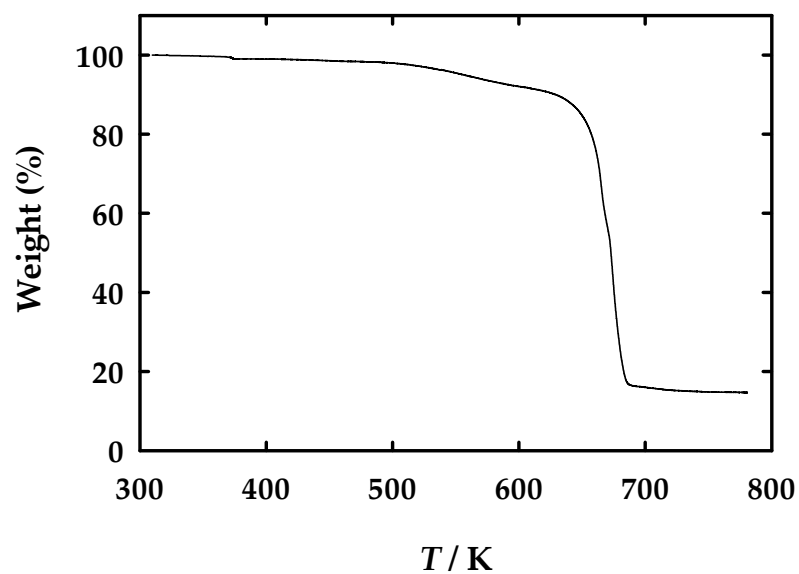

Figure S7. Thermogravimetric curves at 1 K/min of  $[P_{66614}][C_4F_9SO_3]$ .

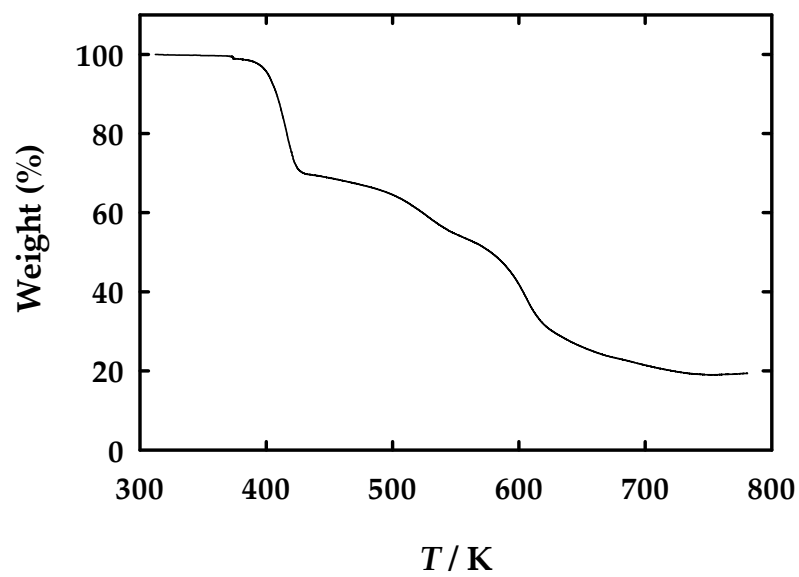

Figure S8. Thermogravimetric curves at 1 K/min of  $[P_{66614}][C_4F_9CO_2]$ .

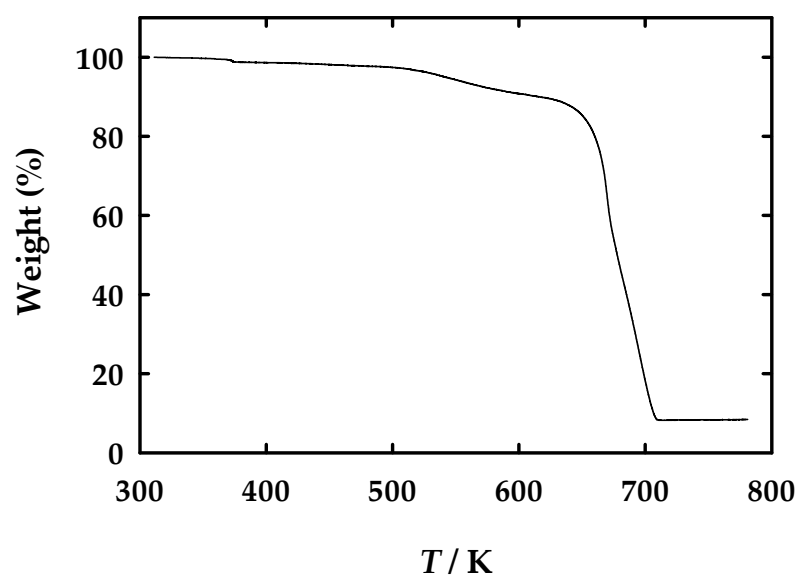

**Figure S9.** Thermogravimetric curves at 1 K/min of  $[P_{44414}][C_4F_9SO_3]$ .

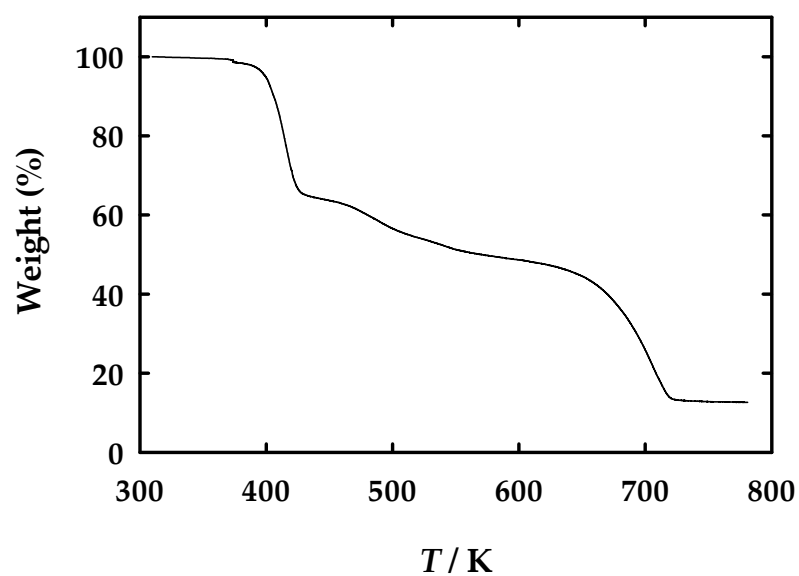

**Figure S10.** Thermogravimetric curves at 1 K/min of  $[P_{44414}][C_4F_9CO_2]$ .

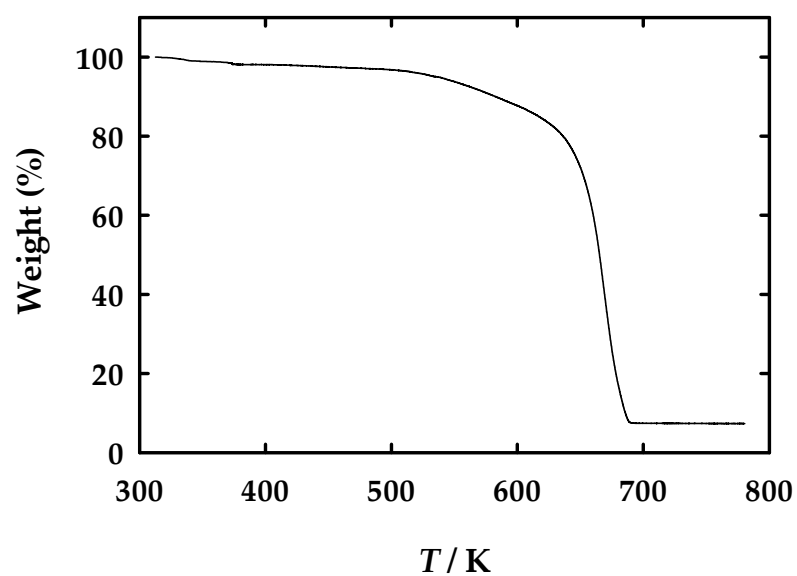

Figure S11. Thermogravimetric curves at 1 K/min of  $[P_{444}][C_4F_9SO_3]$ .

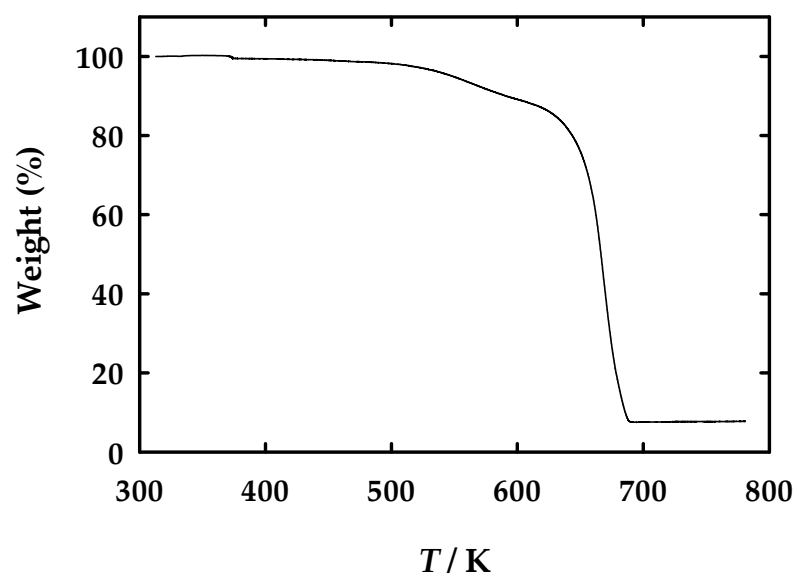

Figure S12. Thermogravimetric curves at 1 K/min of  $[P_{444}][C_4F_9CO_2]$ .

**Table S1.** Density,  $\rho$ , dynamic viscosity,  $\eta$ , refractive index,  $n_D$ , and ionic conductivity,  $k$ , of the fluorinated ionic liquids as a function of temperature.

| FIL                                                                   | $T/K$  | $\rho/g\cdot cm^{-3}$ | $\eta/mPa\cdot s$ | $n_D$  | $k/mS\cdot cm^{-1}$ |
|-----------------------------------------------------------------------|--------|-----------------------|-------------------|--------|---------------------|
| [P <sub>66614</sub> ][C <sub>4</sub> F <sub>9</sub> SO <sub>3</sub> ] | 293.15 | 1.0686                | 947.18            | 1.4368 | 0.0140              |
|                                                                       | 298.15 | 1.0647                | 662.21            | 1.4353 | 0.0201              |
|                                                                       | 303.15 | 1.0607                | 473.41            | 1.4337 | 0.0276              |
|                                                                       | 308.15 | 1.0566                | 345.17            | 1.4321 | 0.0373              |
|                                                                       | 313.15 | 1.0526                | 256.50            | 1.4305 | 0.0491              |
|                                                                       | 318.15 | 1.0483                | 193.99            | 1.4289 | 0.0640              |
|                                                                       | 323.15 | 1.0440                | 149.16            | 1.4273 | 0.0817              |
|                                                                       | 328.15 | 1.0395                | 116.41            | 1.4258 | -                   |
|                                                                       | 333.15 | 1.0355                | 92.166            | 1.4242 | -                   |
|                                                                       | 338.15 | -                     | 73.897            | 1.4227 | -                   |
|                                                                       | 343.15 | -                     | 59.990            | 1.4211 | -                   |
|                                                                       | 348.15 | -                     | 49.254            | 1.4196 | -                   |
|                                                                       | 353.15 | -                     | 40.850            | 1.4180 | -                   |
| [P <sub>66614</sub> ][C <sub>4</sub> F <sub>9</sub> CO <sub>2</sub> ] | 293.15 | 1.0692                | 247.70            | 1.4361 | 0.0319              |
|                                                                       | 298.15 | 1.0649                | 185.13            | 1.4344 | 0.0428              |
|                                                                       | 303.15 | 1.0609                | 141.17            | 1.4328 | 0.0563              |
|                                                                       | 308.15 | 1.0567                | 109.43            | 1.4311 | 0.0725              |
|                                                                       | 313.15 | 1.0526                | 86.140            | 1.4295 | 0.0923              |
|                                                                       | 318.15 | 1.0485                | 69.059            | 1.4278 | 0.115               |
|                                                                       | 323.15 | 1.0447                | 55.617            | 1.4262 | 0.145               |
|                                                                       | 328.15 | 1.0408                | 45.526            | 1.4246 | -                   |
|                                                                       | 333.15 | 1.0371                | 37.684            | 1.4230 | -                   |
|                                                                       | 338.15 | -                     | 31.518            | 1.4213 | -                   |
|                                                                       | 343.15 | -                     | 26.601            | 1.4198 | -                   |
|                                                                       | 348.15 | -                     | 22.654            | 1.4182 | -                   |
|                                                                       | 353.15 | -                     | 19.459            | 1.4166 | -                   |
| [P <sub>44414</sub> ][C <sub>4</sub> F <sub>9</sub> SO <sub>3</sub> ] | 293.15 | 1.1482                | 1934.5            | 1.4327 | 0.0132              |
|                                                                       | 298.15 | 1.1442                | 1289.0            | 1.4312 | 0.0197              |
|                                                                       | 303.15 | 1.1402                | 882.29            | 1.4296 | 0.0281              |
|                                                                       | 308.15 | 1.1362                | 618.10            | 1.4281 | 0.0394              |
|                                                                       | 313.15 | 1.1321                | 442.55            | 1.4265 | 0.0539              |
|                                                                       | 318.15 | 1.1280                | 323.29            | 1.4250 | 0.0724              |
|                                                                       | 323.15 | 1.1242                | 240.53            | 1.4235 | 0.0949              |
|                                                                       | 328.15 | 1.1203                | 182.03            | 1.4219 | -                   |
|                                                                       | 333.15 | 1.1166                | 139.94            | 1.4204 | -                   |
|                                                                       | 338.15 | -                     | 109.11            | 1.4189 | -                   |
|                                                                       | 343.15 | -                     | 86.446            | 1.4174 | -                   |
|                                                                       | 348.15 | -                     | 69.357            | 1.4159 | -                   |
|                                                                       | 353.15 | -                     | 56.216            | 1.4144 | -                   |
| [P <sub>44414</sub> ][C <sub>4</sub> F <sub>9</sub> CO <sub>2</sub> ] | 293.15 | 1.1067                | 297.97            | 1.4303 | 0.0518              |
|                                                                       | 298.15 | 1.1026                | 219.32            | 1.4286 | 0.0704              |
|                                                                       | 303.15 | 1.0985                | 164.46            | 1.4270 | 0.0934              |
|                                                                       | 308.15 | 1.0944                | 125.50            | 1.4253 | 0.122               |
|                                                                       | 313.15 | 1.0905                | 97.330            | 1.4237 | 0.160               |
|                                                                       | 318.15 | 1.0868                | 76.670            | 1.4221 | 0.202               |
|                                                                       | 323.15 | 1.0830                | 61.250            | 1.4205 | 0.252               |
|                                                                       | 328.15 | 1.0793                | 49.580            | 1.4189 | -                   |
|                                                                       | 333.15 | 1.0757                | 40.617            | 1.4173 | -                   |

|        |   |        |        |   |
|--------|---|--------|--------|---|
| 338.15 | - | 33.652 | 1.4157 | - |
| 343.15 | - | 28.350 | 1.4141 | - |
| 348.15 | - | 23.942 | 1.4126 | - |
| 353.15 | - | 20.450 | 1.4110 | - |

**Table S2.** Fitting parameters for the density,  $\rho$ , dynamic viscosity,  $\eta$ , refractive index,  $n_D$ , and ionic conductivity,  $k$ , as a function of temperature for fluorinated ionic liquids. Standard deviations, S.D., are also shown.

|                                                                       |                                    |                                  |                                               |                 |                                               |
|-----------------------------------------------------------------------|------------------------------------|----------------------------------|-----------------------------------------------|-----------------|-----------------------------------------------|
| [P <sub>66614</sub> ][C <sub>4</sub> F <sub>9</sub> SO <sub>3</sub> ] | $\rho/\text{g}\cdot\text{cm}^{-3}$ | <b><math>A_0 = 0.2986</math></b> | <b><math>A_1 = -7.91 \cdot 10^{-4}</math></b> | -               | <b>S.D. = <math>2.38 \cdot 10^{-4}</math></b> |
|                                                                       | $n_D$                              | $A_0 = 1.5286$                   | $A_1 = -3.13 \cdot 10^{-4}$                   | -               | S.D. = $3.67 \cdot 10^{-5}$                   |
|                                                                       | $\eta/\text{mPa}\cdot\text{s}$     | $\eta_0 = 0.0193$                | $B = 1570.4$                                  | $T_0 = 147.72$  | S.D. = $3.03 \cdot 10^{-1}$                   |
|                                                                       | $k/\text{mS}\cdot\text{cm}^{-1}$   | $k_0 = 87.957$                   | $B' = 1041.2$                                 | $T_0' = 174.06$ | S.D. = $3.31 \cdot 10^{-3}$                   |
| [P <sub>66614</sub> ][C <sub>4</sub> F <sub>9</sub> CO <sub>2</sub> ] | $\rho/\text{g}\cdot\text{cm}^{-3}$ | $A_0 = 0.2906$                   | $A_1 = -7.64 \cdot 10^{-4}$                   | -               | S.D. = $1.58 \cdot 10^{-4}$                   |
|                                                                       | $n_D$                              | $A_0 = 1.5311$                   | $A_1 = -3.24 \cdot 10^{-4}$                   | -               | S.D. = $5.31 \cdot 10^{-5}$                   |
|                                                                       | $\eta/\text{mPa}\cdot\text{s}$     | $\eta_0 = 0.0446$                | $B = 1236.1$                                  | $T_0 = 149.81$  | S.D. = $7.88 \cdot 10^{-2}$                   |
|                                                                       | $k/\text{mS}\cdot\text{cm}^{-1}$   | $k_0 = 423.26$                   | $B' = 1510.3$                                 | $T_0' = 133.99$ | S.D. = $4.36 \cdot 10^{-3}$                   |
| [P <sub>44414</sub> ][C <sub>4</sub> F <sub>9</sub> SO <sub>3</sub> ] | $\rho/\text{g}\cdot\text{cm}^{-3}$ | $A_0 = 0.3438$                   | $A_1 = -7.01 \cdot 10^{-4}$                   | -               | S.D. = $9.47 \cdot 10^{-5}$                   |
|                                                                       | $n_D$                              | $A_0 = 1.5220$                   | $A_1 = -3.05 \cdot 10^{-4}$                   | -               | S.D. = $3.47 \cdot 10^{-5}$                   |
|                                                                       | $\eta/\text{mPa}\cdot\text{s}$     | $\eta_0 = 0.0183$                | $B = 1582.7$                                  | $T_0 = 156.34$  | S.D. = $1.21 \cdot 10^{-0}$                   |
|                                                                       | $k/\text{mS}\cdot\text{cm}^{-1}$   | $k_0 = 248.26$                   | $B' = 1179.8$                                 | $T_0' = 173.25$ | S.D. = $3.27 \cdot 10^{-3}$                   |
| [P <sub>44414</sub> ][C <sub>4</sub> F <sub>9</sub> CO <sub>2</sub> ] | $\rho/\text{g}\cdot\text{cm}^{-3}$ | $A_0 = 0.3094$                   | $A_1 = -7.10 \cdot 10^{-4}$                   | -               | S.D. = $1.89 \cdot 10^{-4}$                   |
|                                                                       | $n_D$                              | $A_0 = 1.5240$                   | $A_1 = -3.20 \cdot 10^{-4}$                   | -               | S.D. = $5.27 \cdot 10^{-5}$                   |
|                                                                       | $\eta/\text{mPa}\cdot\text{s}$     | $\eta_0 = 0.0342$                | $B = 1290.8$                                  | $T_0 = 150.88$  | S.D. = $1.56 \cdot 10^{-1}$                   |
|                                                                       | $k/\text{mS}\cdot\text{cm}^{-1}$   | $k_0 = 965.42$                   | $B' = 1533.1$                                 | $T_0' = 137.24$ | S.D. = $5.69 \cdot 10^{-3}$                   |

**Table S3.** Values of calculated molar volume,  $V_m$ , and molar refraction,  $R_m$ , as a function of temperature for selected fluorinated ionic liquids.

| FIL                                                                   | $T/K$  | $V_m/\text{cm}^3\cdot\text{mol}^{-1}$ | $R_m/\text{cm}^3\cdot\text{mol}^{-1}$ |
|-----------------------------------------------------------------------|--------|---------------------------------------|---------------------------------------|
| [P <sub>66614</sub> ][C <sub>4</sub> F <sub>9</sub> SO <sub>3</sub> ] | 293.15 | 732.69                                | 191.88                                |
|                                                                       | 298.15 | 735.37                                | 191.97                                |
|                                                                       | 303.15 | 738.14                                | 192.11                                |
|                                                                       | 308.15 | 741.01                                | 192.24                                |
|                                                                       | 313.15 | 743.82                                | 192.34                                |
|                                                                       | 318.15 | 746.87                                | 192.51                                |
|                                                                       | 323.15 | 749.95                                | 192.67                                |
|                                                                       | 328.15 | 753.20                                | 192.91                                |
|                                                                       | 333.15 | 756.11                                | 193.02                                |
| [P <sub>66614</sub> ][C <sub>4</sub> F <sub>9</sub> CO <sub>2</sub> ] | 293.15 | 698.55                                | 182.65                                |
|                                                                       | 298.15 | 701.37                                | 182.80                                |
|                                                                       | 303.15 | 704.02                                | 182.86                                |
|                                                                       | 308.15 | 706.82                                | 183.00                                |
|                                                                       | 313.15 | 709.57                                | 183.08                                |
|                                                                       | 318.15 | 712.35                                | 183.19                                |
|                                                                       | 323.15 | 714.94                                | 183.26                                |
|                                                                       | 328.15 | 717.62                                | 183.30                                |
|                                                                       | 333.15 | 720.18                                | 183.35                                |
| [P <sub>44414</sub> ][C <sub>4</sub> F <sub>9</sub> SO <sub>3</sub> ] | 293.15 | 608.59                                | 158.08                                |
|                                                                       | 298.15 | 610.72                                | 158.15                                |
|                                                                       | 303.15 | 612.86                                | 158.19                                |
|                                                                       | 308.15 | 615.02                                | 158.26                                |
|                                                                       | 313.15 | 617.25                                | 158.32                                |
|                                                                       | 318.15 | 619.49                                | 158.40                                |
|                                                                       | 323.15 | 621.59                                | 158.45                                |
|                                                                       | 328.15 | 623.75                                | 158.47                                |
|                                                                       | 333.15 | 625.82                                | 158.50                                |
| [P <sub>44414</sub> ][C <sub>4</sub> F <sub>9</sub> CO <sub>2</sub> ] | 293.15 | 598.84                                | 154.76                                |
|                                                                       | 298.15 | 601.07                                | 154.83                                |
|                                                                       | 303.15 | 603.31                                | 154.90                                |
|                                                                       | 308.15 | 605.57                                | 154.94                                |
|                                                                       | 313.15 | 607.73                                | 154.98                                |
|                                                                       | 318.15 | 609.80                                | 154.99                                |
|                                                                       | 323.15 | 611.94                                | 154.99                                |
|                                                                       | 328.15 | 614.04                                | 155.03                                |
|                                                                       | 333.15 | 616.10                                | 155.03                                |
