# Supplementary material for: Synthesis and Characterization of Fluorinated Phosphonium Ionic Liquids to Use as New Engineering Solvents
Source: MDPI journal article supplement (doi:10.3390/chemengineering6030038), 2022-05-24
Supplement: s1 [file s1]

Archive with 1 entries (1 files):
- ChemEngineering-1727035-supplementary.pdf
